# Supplementary material for: Facile synthesis of hierarchical ZnIn2S4 submicrospheres composed of ultrathin mesoporous nanosheets as a highly efficient visible-light-driven photocatalyst for H2 production
Source: Royal Society of Chemistry journal article supplement (doi:10.1039/c3ta01685d), 2013-01-01
Supplement: c3ta01685d.pdf [file c3ta01685d.pdf]

## Electronic Supplementary Information

### Facile synthesis of hierarchical $\text{ZnIn}_2\text{S}_4$ submicrospheres composed of ultrathin mesoporous nanosheets as a highly efficient visible-light-driven photocatalyst for $\text{H}_2$ production

Lu Shang,<sup>ab</sup> Chao Zhou,<sup>a</sup> Tong Bian,<sup>ab</sup> Huijun Yu,<sup>ab</sup> Li-Zhu Wu,<sup>a</sup> Chen-Ho Tung,<sup>a</sup> and Tierui Zhang<sup>\*a</sup>

<sup>a</sup>Key Laboratory of Photochemical Conversion and Optoelectronic Materials, Technical Institute of Physics and Chemistry, Chinese Academy of Sciences, Beijing, 100190, P. R. China.

<sup>b</sup>University of Chinese Academy of Sciences, Beijing, 100049, P. R. China

\*Corresponding author. E-mail: tierui@mail.ipc.ac.cn.

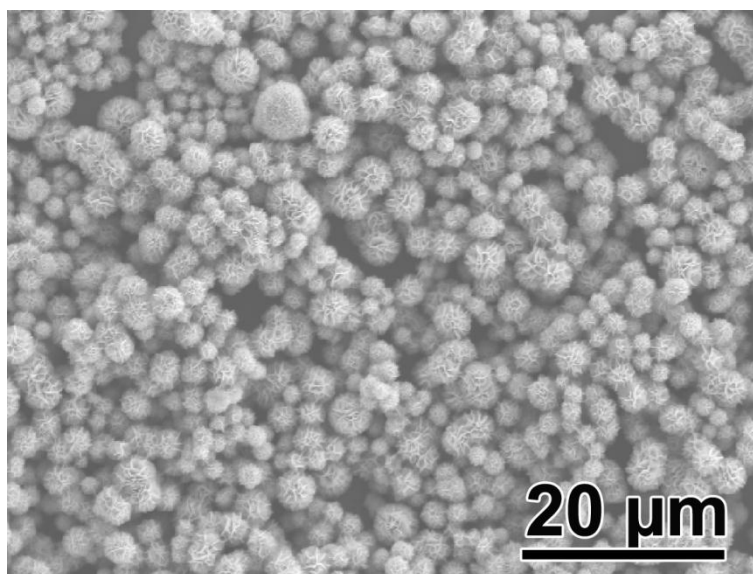

Fig. S1 SEM image of  $\text{ZnIn}_2\text{S}_4\text{-H}$ .

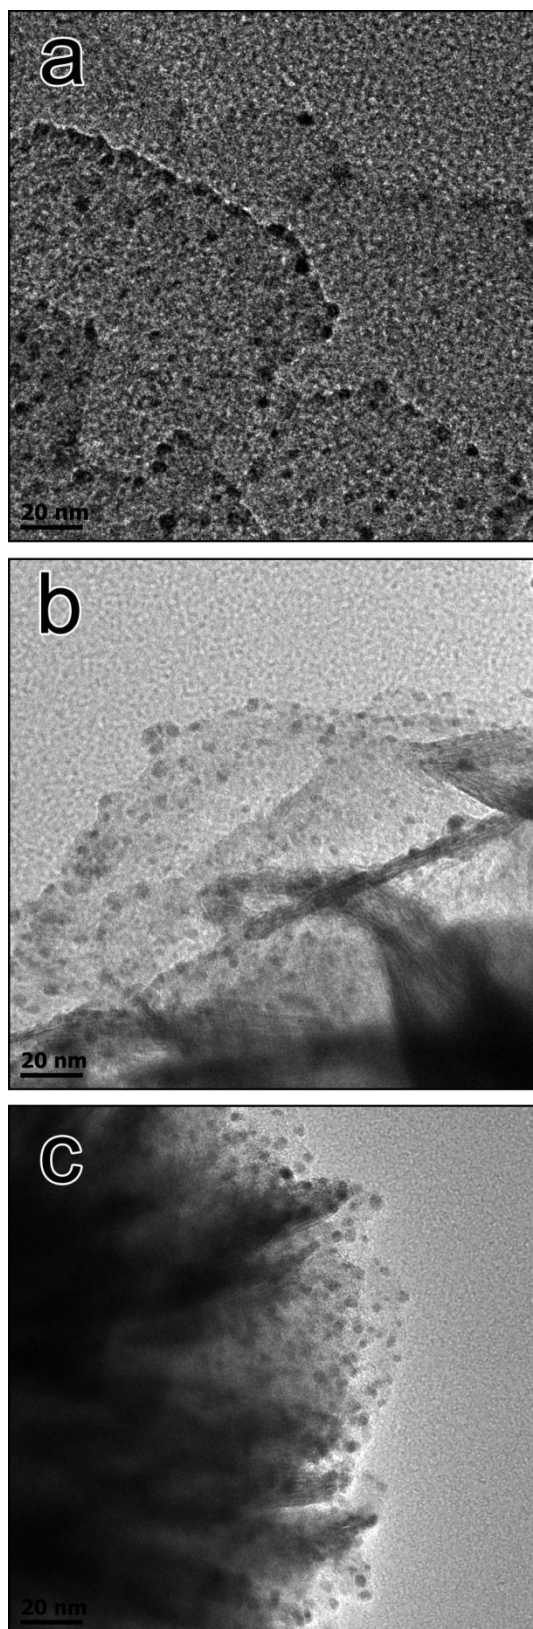

Fig. S2 TEM images of 1 wt% Pt/ZnIn<sub>2</sub>S<sub>4</sub>-220, 1 wt% Pt/ZnIn<sub>2</sub>S<sub>4</sub>-200, and 1 wt% Pt/ZnIn<sub>2</sub>S<sub>4</sub>-H.

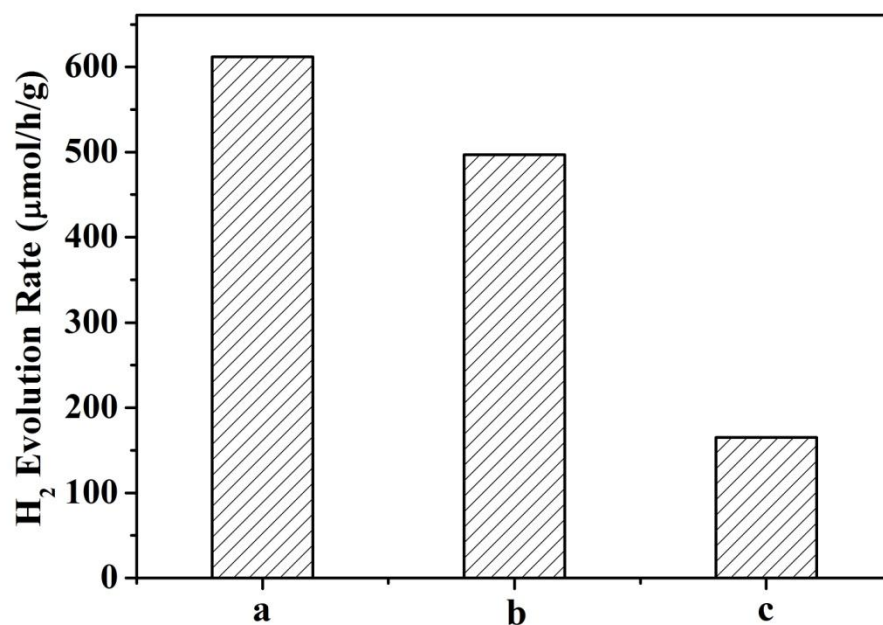

Fig. S3 Photocatalytic H<sub>2</sub> evolution rates over (a) 1 wt% Pt/ZnIn<sub>2</sub>S<sub>4</sub>-220; (b) 1 wt% Pt/ZnIn<sub>2</sub>S<sub>4</sub>-200; and (c) 1 wt% Pt/ZnIn<sub>2</sub>S<sub>4</sub>-H from an aqueous solution containing both Na<sub>2</sub>SO<sub>3</sub> and Na<sub>2</sub>S under visible light irradiation ( $\lambda > 420$  nm) in 2 h.

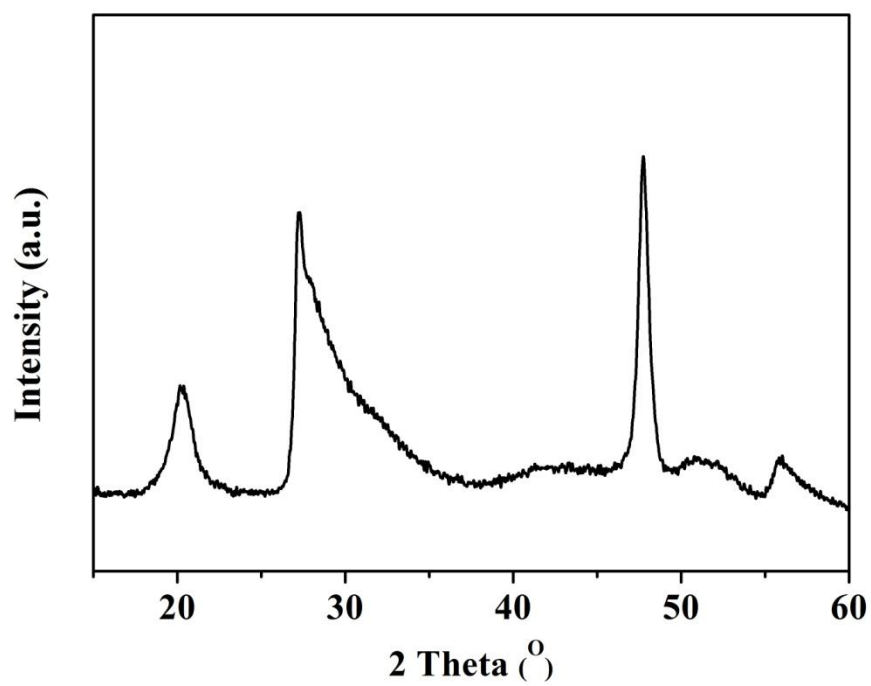

Fig. S4 XRD pattern of  $\text{ZnIn}_2\text{S}_4\text{-220}$  after 5 photocatalytic runs.

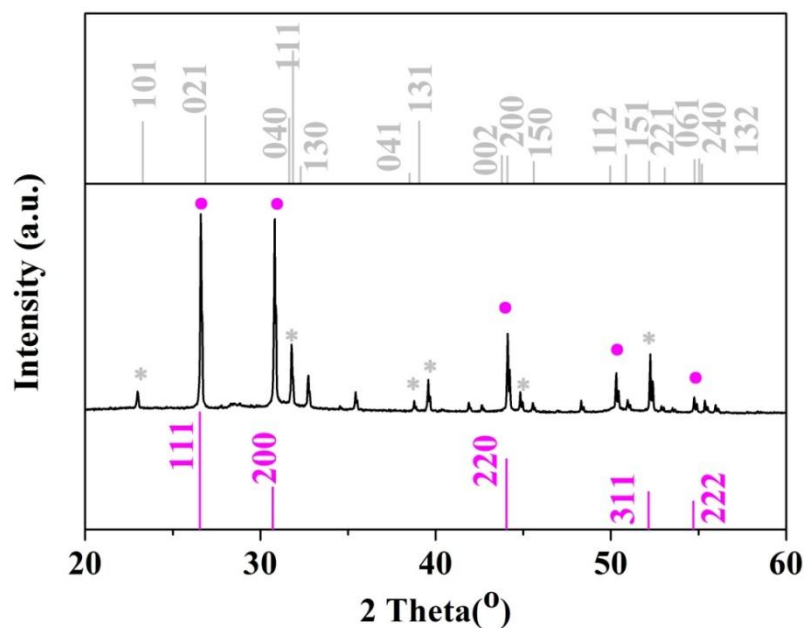

Fig. S5 XRD patterns of as-synthesized SnS (dark; \* orthorhombic SnS, • zinc blende SnS), and standard cards of orthorhombic SnS (grey, JCPDS No. 83-1758) and zinc blende SnS (magenta, see ref. 29,30). The additional peaks assigned to a trace amount of impurities (most likely  $\text{Sn}(\text{OH})_2$  and  $\text{SnO}_2$ ) were also found in this sample.
